# Supplementary material for: An integrated map of cell type-specific gene expression in pancreatic islets
Source: PubMed Central journal article supplement — bioRxiv. 2023 Feb 4:2023.02.03.526994. Preprint. [Version 1] doi: 10.1101/2023.02.03.526994 (PMC9915747; doi:10.1101/2023.02.03.526994), 2023-02-04
Supplement: NIHPP2023.02.03.526994v1-supplement-2.pdf [file NIHPP2023.02.03.526994v1-supplement-2.pdf]

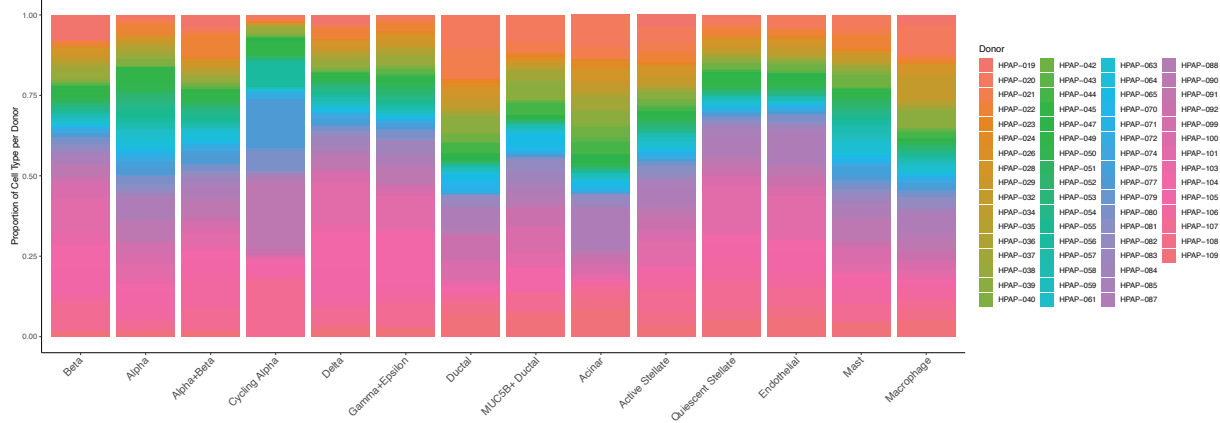

**Supplementary Figure 1. Sample representation per cluster.** Proportion of cells in each cluster from all donor samples in HPAP. No clusters have representation from only a small number of donors.

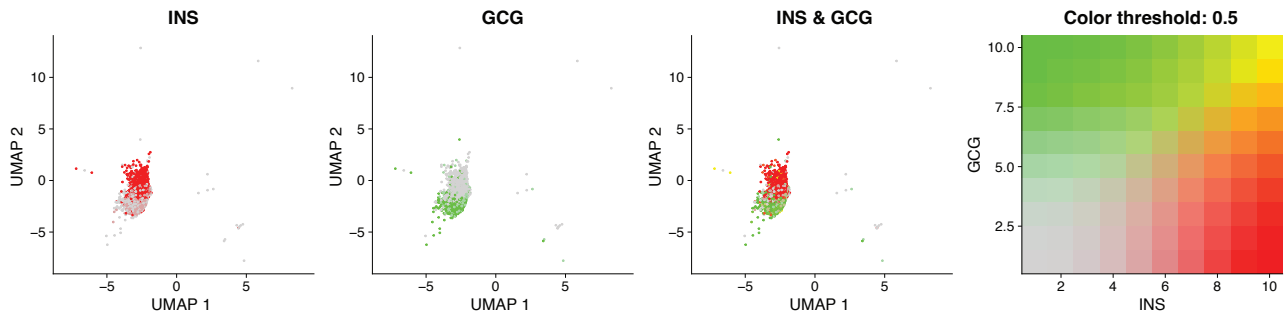

**Supplementary Figure 2. Marker gene expression in alpha+beta cluster.** Expression level of insulin and glucagon separately, as well as overlaid together, in the alpha+beta cluster. The insulin and glucagon expressing cells within this cluster appear largely distinct.

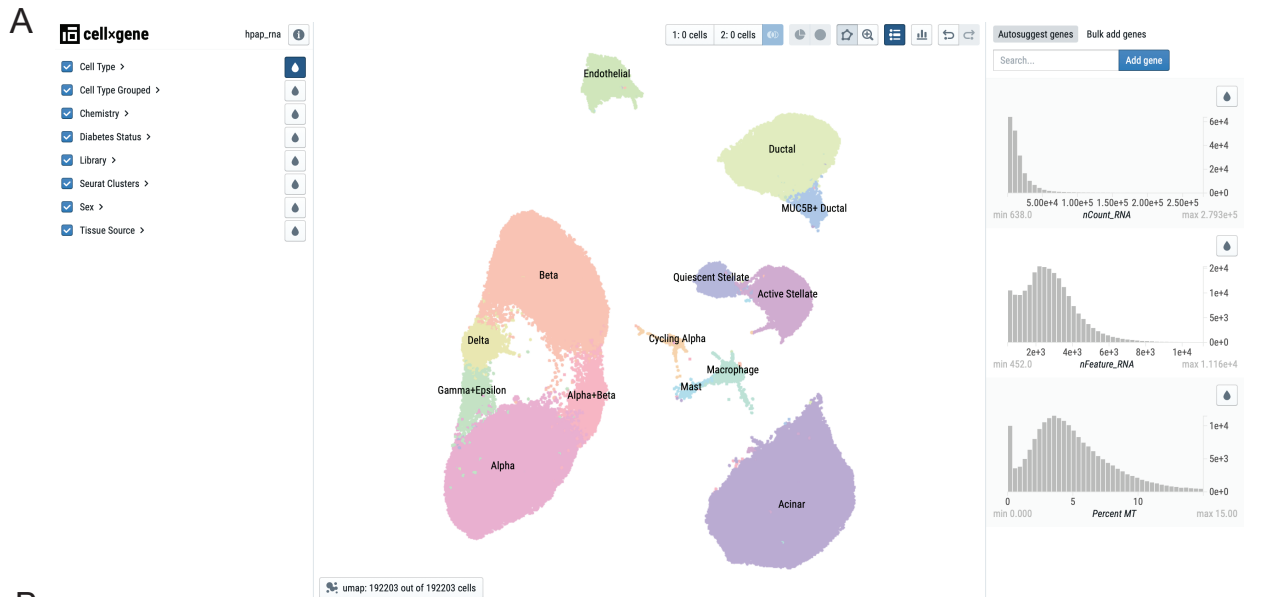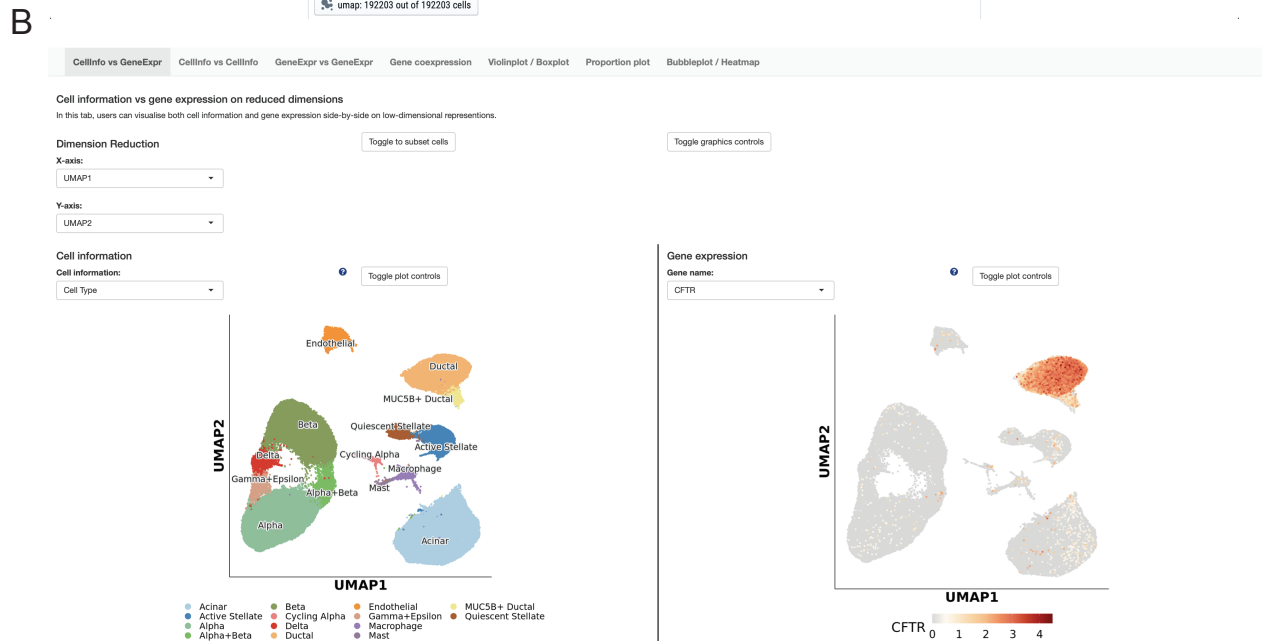

**Supplementary Figure 3. Visualizing single cell profiles in islet cell types.** (A) Islet single cell object in Cellxgene browser including cell type labels and technical features. (B) Islet single cell object in ShinyCell including cell type labels and expression of selected gene.

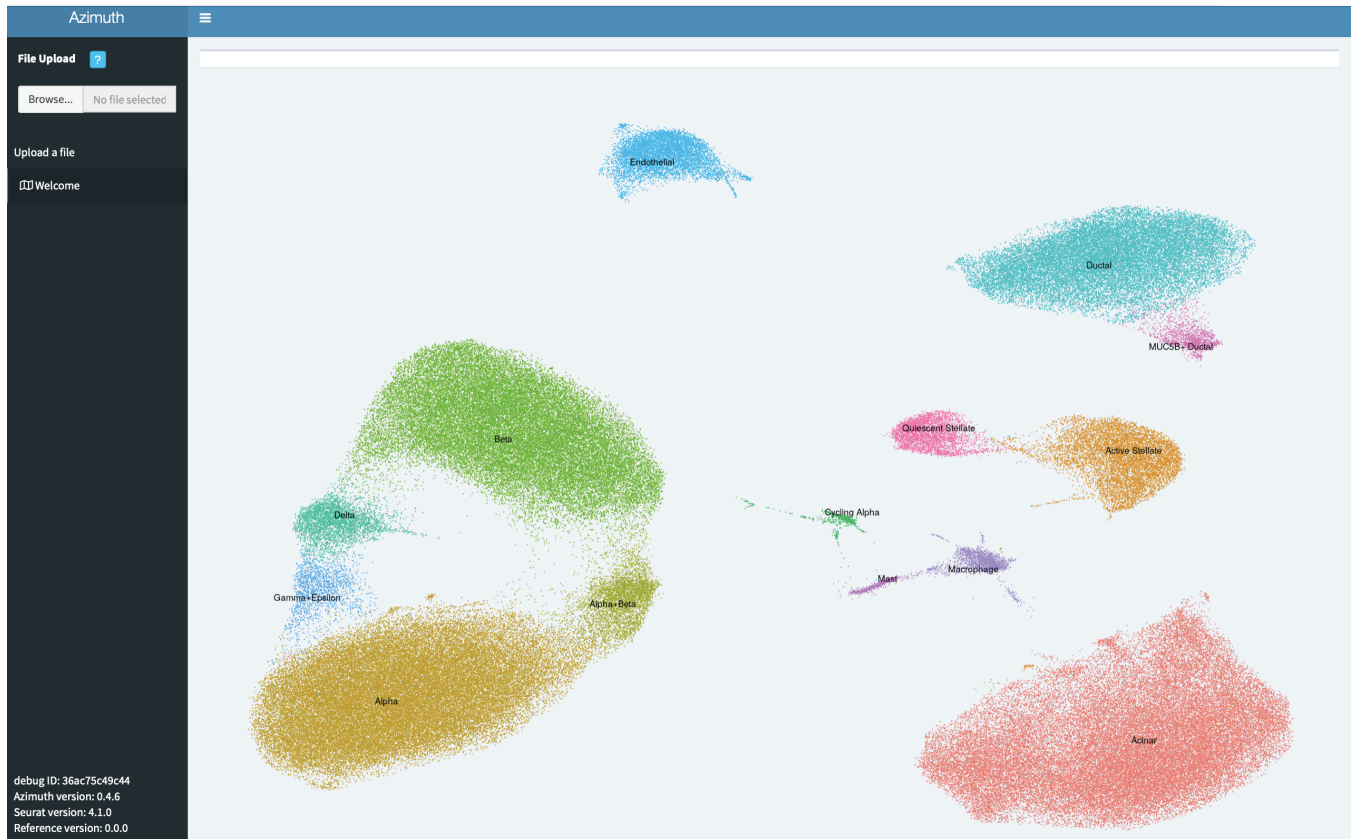

**Supplementary Figure 4. Reference mapping of islet single cell gene expression.** Screenshot of islet cell type expression in the Azimuth application which enables users to upload their own data and perform annotation of cell type identity.

A

Gene expression by diabetes status   Gene expression by diabetes status & celltype   Gene expression by samples   Gene expression by samples & celltype   Gene expression

Show 25 entries

| Gene        | Acinar       | Alpha        | Alpha.Beta  | Beta         | Delta       | Ductal       | Endothelial | Gamma.Epsilon | Macrophage   | Mast       | Stellate     |
|-------------|--------------|--------------|-------------|--------------|-------------|--------------|-------------|---------------|--------------|------------|--------------|
| AIBG        | 3.212641e+00 | 4.675087e+01 | 34.81347390 | 2.847356e+01 | 33.66548633 | 1.096773e+00 | 6.29970261  | 45.46132061   | 4.548228e+01 | 42.3763157 | 4.586925e+01 |
| AIBG-AS1    | 2.320169e-01 | 3.400946e+00 | 1.36038210  | 1.841105e+00 | 2.0532227   | 1.244174e-01 | 1.04563459  | 3.54291173    | 5.364167e+00 | 1.3527215  | 4.622447e+00 |
| ACF         | 4.828836e-01 | 4.883233e+00 | 1.07896970  | 4.115999e-01 | 1.95889522  | 1.630135e-01 | 0.21819035  | 3.48709175    | 3.037363e-01 | 0.1312167  | 1.402195e-01 |
| AZM         | 1.808825e-01 | 3.933402e-01 | 3.06446338  | 6.079455e-02 | 0.01745652  | 1.525629e-01 | 90.65889108 | 0.05574615    | 1.025682e+02 | 5.0701892  | 1.095499e+02 |
| AZM-AS1     | 1.879183e-01 | 2.791509e-01 | 0.10145575  | 1.444395e-01 | 0.39886154  | 3.725872e-01 | 1.19519589  | 0.28253513    | 2.292314e+00 | 6.9657428  | 6.839012e-01 |
| AZML1       | 2.405591e-03 | 1.549727e-02 | 0.00000000  | 3.989762e-03 | 0.00000000  | 1.719600e-03 | 0.02021480  | 0.00000000    | 7.533078e-03 | 0.00000000 | 1.494020e-02 |
| AZML1-AS1   | 4.543127e-03 | 4.980638e-02 | 0.00000000  | 1.541975e-02 | 0.10896336  | 3.179456e-02 | 0.05003053  | 0.29445625    | 0.000000e+00 | 0.00000000 | 2.637030e-02 |
| AZML1-AS2   | 3.574426e-04 | 1.167073e-02 | 0.00000000  | 0.000000e+00 | 0.00000000  | 1.992948e-02 | 0.00000000  | 0.00000000    | 0.000000e+00 | 0.00000000 | 0.000000e+00 |
| AZGALT2     | 2.697417e-04 | 2.968884e-03 | 0.00000000  | 1.668849e-03 | 0.00000000  | 0.000000e+00 | 0.05488237  | 0.00000000    | 1.835194e-01 | 0.00000000 | 5.348390e-02 |
| AZGALT      | 1.476048e-01 | 8.393954e-01 | 0.50686921  | 1.355326e-01 | 0.66745200  | 1.195134e+01 | 83.85668240 | 2.18426302    | 3.063457e+00 | 0.6775548  | 2.593378e+01 |
| AZGNT       | 0.000000e+00 | 3.551597e-03 | 0.00000000  | 3.067598e-04 | 0.00000000  | 5.401533e-02 | 0.00000000  | 0.00000000    | 0.000000e+00 | 0.00000000 | 3.154011e-03 |
| AAAS        | 1.809350e+00 | 4.009987e+00 | 1.59150034  | 1.854512e+00 | 2.93225258  | 5.206393e+00 | 4.89089147  | 3.01089727    | 3.971748e+00 | 1.9164218  | 4.704565e+00 |
| AACS        | 1.748550e+00 | 1.262717e+01 | 8.36942443  | 5.985727e+00 | 7.38081529  | 6.528281e+00 | 3.45589817  | 8.81303437    | 3.334672e+00 | 6.2701363  | 8.330804e+00 |
| AADC        | 2.330674e+01 | 2.674009e-01 | 0.31963282  | 1.063461e-01 | 0.32911968  | 7.674094e-01 | 0.19566896  | 0.12992847    | 1.380664e+00 | 0.00000000 | 1.672720e+00 |
| AADACL2     | 3.856332e-04 | 8.978832e-04 | 0.00000000  | 0.000000e+00 | 0.00000000  | 0.000000e+00 | 0.00000000  | 0.00000000    | 0.000000e+00 | 0.00000000 | 0.000000e+00 |
| AADACL2-AS1 | 0.000000e+00 | 0.000000e+00 | 0.00000000  | 0.000000e+00 | 0.00000000  | 5.780649e-02 | 0.00000000  | 0.00000000    | 0.000000e+00 | 0.00000000 | 0.000000e+00 |
| AADACL3     | 0.000000e+00 | 0.000000e+00 | 0.00000000  | 0.000000e+00 | 0.00000000  | 5.175530e-04 | 0.00000000  | 0.00000000    | 0.000000e+00 | 0.00000000 | 0.000000e+00 |
| AADACL4     | 0.000000e+00 | 1.496356e-03 | 0.00000000  | 5.380547e-04 | 0.00000000  | 5.772612e-04 | 0.00000000  | 0.00000000    | 0.000000e+00 | 0.00000000 | 1.002966e-02 |
| AADAT       | 5.883759e-01 | 2.095760e+00 | 1.08894384  | 1.807596e+00 | 1.37009128  | 2.053139e+00 | 0.23176832  | 1.67013473    | 2.308009e+01 | 0.2230563  | 2.011294e+00 |
| AAGAB       | 4.113689e+00 | 1.486549e+01 | 7.39879284  | 4.955785e+00 | 9.81552314  | 1.873571e+01 | 9.82559641  | 12.67439143   | 6.064798e+00 | 8.7762598  | 8.197081e+00 |
| AAK1        | 1.341733e+00 | 9.045858e+00 | 3.84183234  | 2.523636e+00 | 4.91200539  | 8.038964e+00 | 8.98594722  | 6.87635383    | 8.912870e+00 | 9.1263572  | 8.209565e+00 |
| AAMDC       | 9.782857e+00 | 1.571561e+01 | 9.78155343  | 9.108193e+00 | 9.44062464  | 5.850733e+01 | 84.94739670 | 15.74072116   | 1.896133e+01 | 32.3489074 | 5.893165e+01 |
| AAMP        | 1.108992e+01 | 3.348245e+01 | 16.21611908 | 1.142306e+01 | 22.98702357 | 4.695322e+01 | 55.04142572 | 30.01772298   | 2.625547e+01 | 25.1772350 | 5.962886e+01 |
| AANAT       | 2.82549e-02  | 8.765289e-02 | 0.07863297  | 2.345003e-02 | 0.09784104  | 1.336035e-02 | 0.37817407  | 0.06044421    | 7.863072e-03 | 0.00000000 | 1.398393e-01 |
| AARP        | 2.170895e+00 | 5.136682e+00 | 2.78786243  | 1.350566e+00 | 2.53887984  | 8.567738e+00 | 12.96747687 | 4.45703714    | 5.783508e+00 | 4.8341910  | 1.009426e+01 |

Gene   Acinar   Alpha   Alpha.Beta   Beta   Delta   Ductal   Endothelial   Gamma.Epsilon   Macrophage   Mast   Stellate

B

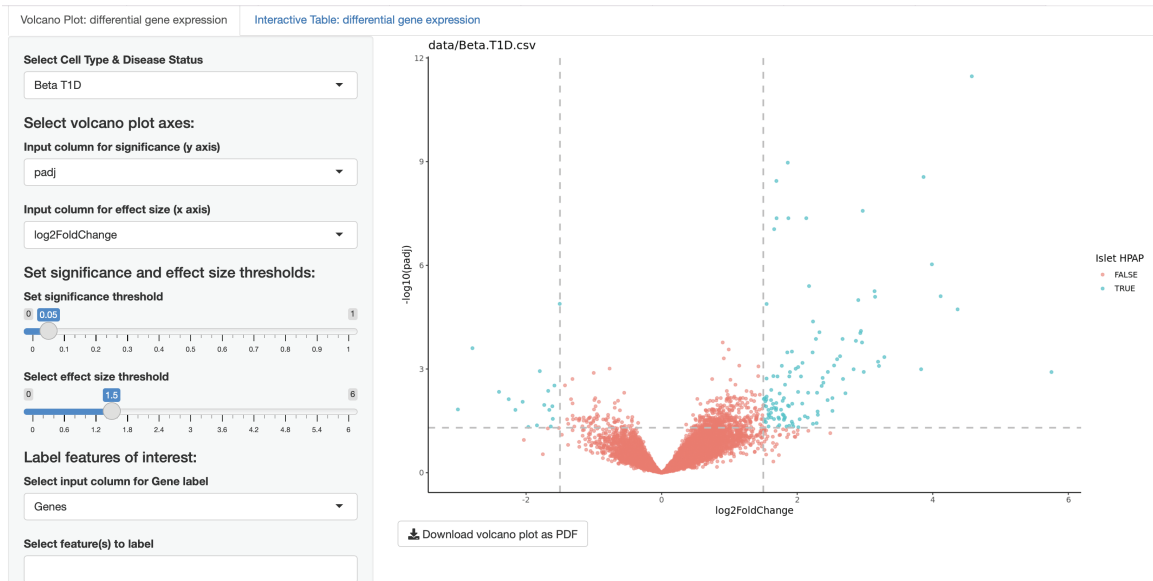

**Supplementary Figure 5. Querying and visualizing islet cell type-specific expression.** (A) Interactive table showing normalized expression levels of genes in each identified cell type. (B) Interactive visualization of differential cell type expression in disease states.
